# Supplementary material for: Cumulative Risk Assessment of Dietary Exposure to Pesticide Residues in Brown Rice (Oryza sativa L.) from the Three Main Rice-Growing Regions in China during 2016–2020
Source: Hindawi journal article supplement (doi:10.1155/2022/5902540), 2022-10-08
Supplement: f1 [file 5902540.f1.docx]

**
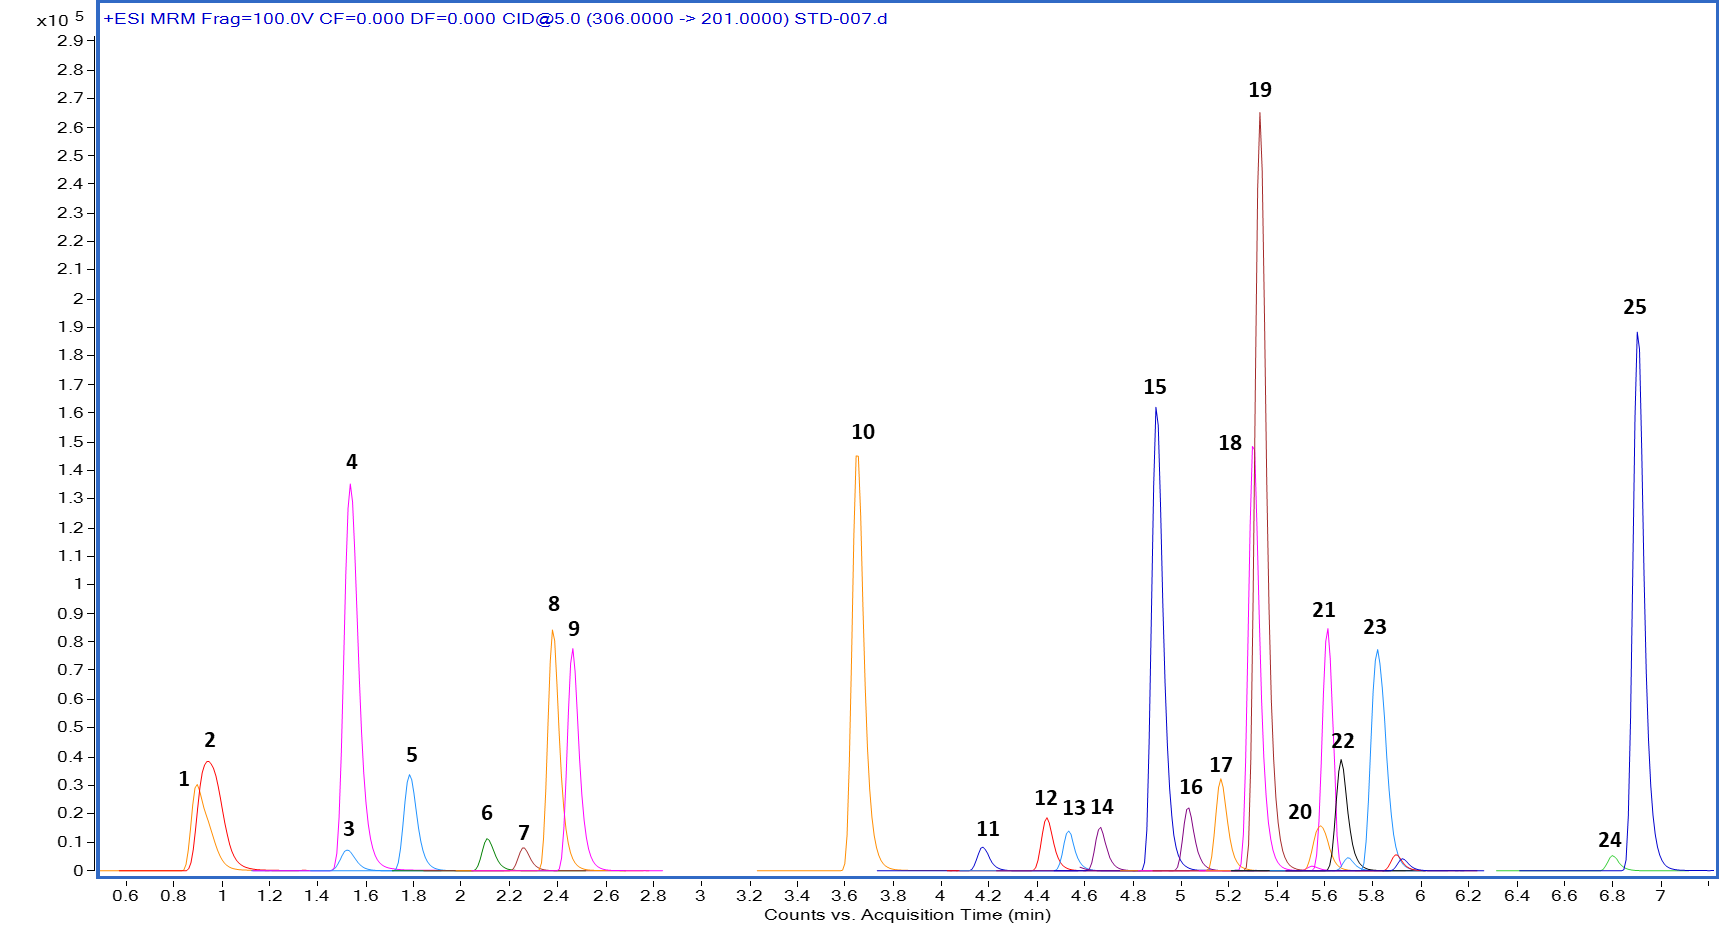
**

**Figure S1.** The chromatograms of 25 pesticides in a standard mixture at 0.1 mg L−1

**Table S1.** The optimized MRMparameters of 25 pesticides analyzed in this study

| Pesticide | Retention time (min) | Precursor ion (m/z) | Product ions (m/z) | Frag (V) | CE (V) |
| --- | --- | --- | --- | --- | --- |
| Methamidophos | 0.89 | 142 | 94 | 85 | 9 |
| Pymetrozine | 0.97 | 218.2 | 105 | 115 | 20 |
| Nitenpyram | 1.52 | 271 | 126 | 105 | 32 |
| Carbendazim | 1.52 | 192 | 160 | 95 | 17 |
| Thiamethoxam | 1.79 | 292.1 | 211 | 75 | 5 |
| Clothianidin | 2.11 | 250.2 | 132 | 95 | 16 |
| Imidacloprid | 2.24 | 256 | 209 | 90 | 13 |
| Dimethoate | 2.38 | 230 | 199 | 70 | 5 |
| Acetamiprid | 2.44 | 223 | 126 | 100 | 21 |
| Carbofuran | 3.63 | 222 | 123.1 | 80 | 17 |
| Isoprocarb | 4.14 | 194 | 95 | 70 | 9 |
| Chlorantraniliprole | 4.42 | 484 | 453 | 120 | 16 |
| Isocarbophos | 4.47 | 231 | 121 | 100 | 9 |
| Fenobucarb | 4.62 | 208.2 | 95 | 105 | 12 |
| Azoxystrobin | 4.87 | 404 | 372 | 105 | 9 |
| Triadimefon | 4.97 | 294 | 69 | 100 | 21 |
| Tebuconazole | 5.14 | 308 | 70 | 130 | 20 |
| Triazophos | 5.25 | 314 | 162 | 100 | 13 |
| Isoprothiolane | 5.27 | 291.1 | 231 | 80 | 5 |
| Fipronil | 5.47 | 435 | 330 | 115 | 12 |
| Propiconazole | 5.53 | 342 | 69 | 130 | 17 |
| Prochloraz | 5.62 | 376 | 70 | 80 | 25 |
| Difenoconazole | 5.79 | 406 | 251 | 130 | 25 |
| Chlorpyrifos | 6.72 | 350 | 97 | 100 | 37 |
| Buprofezin | 6.81 | 306 | 201 | 100 | 5 |

The gas temperature, gas flow, nebulizer pressure, sheath gas temperature, sheath gas flow and capillary were set at 300℃, 5 L min-1, 45 psi, 350℃, 12 L min-1 and 3500V, respectively.

**Table S2.** Ranking criteria of pesticide risk in brown rice

| Class | Index | Definition | Score | Definition | Score | Definition | Score | Definition | Score |
| --- | --- | --- | --- | --- | --- | --- | --- | --- | --- |
| A | Toxicity | Low | 2 | Moderate | 3 | High | 4 | Hypertoxic | 5 |
| B | Potency (mg kg-1) | >10-2 | 0 | 10-4-10-2 | 1 | 10-6-10-4 | 2 | <10-6 | 3 |
| C | Dietary proportion (%) | <2.5 | 0 | 2.5-20 | 1 | 20-50 | 2 | 50-100 | 3 |
| D | Frequency of dosing (%) | <2.5 | 0 | 2.5-20 | 1 | 20-50 | 2 | 50-100 | 3 |
| E | High exposure population | No | 0 | Unlikely | 1 | Likely | 2 | No data | 3 |
| F | Residue level (mg kg-1) | ND | 0 | <1 MRL | 1 | ≥1MRL-10MRL | 2 | ≥10 MRL | 3 |

**Table S3.** The rice daily intake by per kilogram of body weight (g/kg.bw/day) for Chinese residents.

| Age Class | Age (years) | Meana  (g/kg.bw/day) | P97.5a  (g/kg.bw/day) | Meanb  (g/kg.bw/day) | P97.5b  (g/kg.bw/day) |
| --- | --- | --- | --- | --- | --- |
| Children and Adolescents | 3-5 | 9.29 | 24.44 | 8.32 | 21.88 |
| 6-14 | 7.36 | 19.32 |
| Adults and Elderly | 15-49 | 4.57 | 11.88 | 4.19 | 11.09 |
| 50-74 | 4.23 | 11.40 |
| >75 | 3.77 | 10.00 |

a The mean and P97.5 daily intake of rice (g/kg.bw/day) for different ages were obtained from the WHO database (https://apps.who.int/foscollab/Download/DownloadConso)

b The mean and P97.5 daily intake of rice (g/kg.bw/day) for children and adolescents, adults and elderly are calculated as the average values of those in different ages.
